# Supplementary material for: NCBP2 modulates neurodevelopmental defects of the 3q29 deletion in Drosophila and Xenopus laevis models
Source: PLOS journal article supplement (doi:10.1371/journal.pgen.1008590), 2020-02-13
Supplement: S23 (10.1371/journal.pgen.1008590.s023) [file journal.pgen.1008590.s023]

| Second-hit homolog                        | Cell cycle/<br>apoptosis | Microcephaly | <i>Cbp20</i> <sup>KK109448</sup> | <i>CG8888</i> <sup>GD3777</sup> | <i>dlg1</i> <sup>GD4689</sup> | <i>Pak</i> <sup>KK101874</sup> |
|-------------------------------------------|--------------------------|--------------|----------------------------------|---------------------------------|-------------------------------|--------------------------------|
| <i>Arm</i> (CTNNB1)                       | X                        |              | Enhancer (2/2)                   | Enhancer (2/2)                  | Enhancer (2/2)                | Enhancer (2/2)                 |
| <i>Asp</i> (ASPM)                         | X                        | X            | Enhancer (1/1)                   | Enhancer (1/1)                  | No interaction (0/1)          | No interaction (0/1)           |
| <i>Cadps</i> (CADPS2)                     |                          |              | Enhancer (2/2)                   | Not validated (1/2)             | Not validated (1/2)           | Enhancer (2/2)                 |
| <i>Eph</i> (EPHA6)                        |                          |              | Enhancer (3/3)                   | Enhancer (3/3)                  | Enhancer (3/3)                | Not validated (1/3)            |
| <i>kis</i> (CHD8)                         | X                        |              | Not validated (1/2)              | No interaction (0/2)            | No interaction (0/2)          | No interaction (0/2)           |
| <i>Klp61F</i> (KIF11)                     | X                        | X            | Enhancer (2/2)                   | Enhancer (1/1)                  | Enhancer (1/1)                | Enhancer (1/1)                 |
| <i>MCPH1</i> (MCPH1)                      | X                        | X            | Enhancer (2/3)                   | Enhancer (3/3)                  | No interaction (0/3)          | Not validated (1/3)            |
| <i>nAChRa6</i><br><i>nAChRa7</i> (CHRNA7) |                          |              | Enhancer (3/5)                   | Enhancer (3/5)                  | Enhancer (3/5)                | Enhancer (2/5)                 |
| <i>Nrx-1</i> (NRXN1)                      |                          |              | Enhancer (3/3)                   | Enhancer (3/3)                  | Enhancer (3/3)                | No interaction (0/3)           |
| <i>para</i> (SCN1A)                       |                          |              | Enhancer (3/3)                   | Enhancer (2/3)                  | No interaction (0/3)          | Not validated (1/3)            |
| <i>Prosap</i> (SHANK3)                    |                          |              | Not validated (1/2)              | No interaction (0/2)            | Not validated (1/2)           | No interaction (0/2)           |
| <i>Pten</i> (PTEN)                        | X                        |              | Enhancer (2/2)                   | Enhancer (2/2)                  | Enhancer (2/2)                | Not validated (1/2)            |
| <i>Rk</i> (LGR5)                          | X                        |              | Enhancer (4/5)                   | Enhancer (3/5)                  | No interaction (0/5)          | No interaction (0/5)           |
| <i>Sas-4</i> (CENPJ)                      | X                        | X            | Enhancer (2/2)                   | Enhancer (2/2)                  | Not validated (1/2)           | No interaction (0/2)           |
| <i>Ube3a</i> (UBE3A)                      |                          |              | Enhancer (2/2)                   | Not validated (1/2)             | No interaction (0/2)          | Not validated (1/2)            |
|                                           |                          |              |                                  |                                 |                               |                                |
| <b>Lines tested (153)</b>                 |                          |              | 39                               | 38                              | 38                            | 38                             |
| <b>All interactions (46/60)</b>           |                          |              | 15/15                            | 13/15                           | 9/15                          | 9/15                           |
| <b>Validated interactions (34/60)</b>     |                          |              | 13/15                            | 11/15                           | 6/15                          | 4/15                           |
